# Supplementary material for: Transcriptome Identification of R2R3-MYB Gene Family Members in Pinus massoniana and PmMYB4 Response to Drought Stress
Source: MDPI journal article supplement (doi:10.3390/f14020410), 2023-02-16
Supplement: s1 [file s1]

**Table S1.** Primer sequence for gene expression analysis.

| Primer Name     | Primer Sequence (5'-3')                     |
|-----------------|---------------------------------------------|
| PmMYB4-F        | ATGAGCTGCACAACAGGAGGA                       |
| PmMYB4-R        | TTAGCCAAAATAGATCTGACCT                      |
| PmMYB4-Q-F      | GCTGTAGGCTGAGGTGGATT                        |
| PmMYB4-Q-R      | TCATGGTACTGGTACGATTAGGTGC                   |
| TUA-F           | CAAACCTGGTCCCGTATCCTC                       |
| TUA-R           | CACAGAAAGCTGCTCATGGTAA                      |
| Pro-PmMYB4-F    | CATTGCCCATATTAAAAAACTAT                     |
| Pro-PmMYB4-R    | CCTTTCCTTAGCTTGGGTTTGG                      |
| pET28a-PmMYB4-F | CAGCAAATGGGTCGCGGATCCATGAGCTGCACAACAGGAGGA  |
| pET28a-PmMYB4-R | GTGGTGGTGGTGGTGCTCGAGGCTAGGTCAGATCTATTTTGGC |

**Table S2.** Physicochemical properties of R2R3-MYBs in *Pinus massoniana*.

| Protein name | Number of amino acids | Isoelectric point(pI) | Molecular weight(kDa) | Instability index | Grand average of hydropathicity (GRAVY) | Subcellular localization | Transmembrane structure | Signal peptides |
|--------------|-----------------------|-----------------------|-----------------------|-------------------|-----------------------------------------|--------------------------|-------------------------|-----------------|
| PmMYB1       | 300                   | 5.18                  | 33496.26              | 46.12             | -0.782                                  | nuclear                  | none                    | no              |
| PmMYB2       | 449                   | 5.64                  | 51034.35              | 51.77             | -0.757                                  | nuclear                  | none                    | no              |
| PmMYB3       | 449                   | 9.2                   | 50840.89              | 59.4              | -0.816                                  | nuclear                  | none                    | no              |
| PmMYB4       | 490                   | 5.43                  | 54207.85              | 50.23             | -0.635                                  | nuclear                  | none                    | no              |
| PmMYB5       | 255                   | 7.61                  | 28728.46              | 58.17             | -0.667                                  | nuclear                  | none                    | no              |
| PmMYB6       | 374                   | 5.56                  | 41873.74              | 55.09             | -0.68                                   | nuclear                  | none                    | no              |
| PmMYB7       | 374                   | 7.72                  | 40782.01              | 51.89             | -0.483                                  | nuclear                  | none                    | no              |
| PmMYB8       | 533                   | 5.59                  | 59059.31              | 44.57             | -0.629                                  | nuclear                  | none                    | no              |
| PmMYB9       | 412                   | 6.62                  | 45039.17              | 60.88             | -0.811                                  | nuclear                  | none                    | no              |
| PmMYB10      | 472                   | 5.91                  | 52926.89              | 48.4              | -0.734                                  | nuclear                  | none                    | no              |
| PmMYB11      | 534                   | 8.99                  | 60021.8               | 67.85             | -0.557                                  | nuclear                  | none                    | no              |
| PmMYB12      | 512                   | 8.3                   | 57632.71              | 59.98             | -0.765                                  | nuclear                  | none                    | no              |
| PmMYB13      | 279                   | 8.82                  | 30678.53              | 67.32             | -0.658                                  | nuclear                  | none                    | no              |
| PmMYB14      | 233                   | 8.93                  | 25982.49              | 51.21             | -0.573                                  | nuclear                  | none                    | no              |
| PmMYB15      | 498                   | 6.31                  | 55156.38              | 72.48             | -1.185                                  | nuclear                  | none                    | no              |
| PmMYB16      | 280                   | 5.76                  | 31314.25              | 48.39             | -0.493                                  | nuclear                  | none                    | no              |
| PmMYB17      | 1502                  | 9.41                  | 160729.68             | 61.95             | -0.741                                  | nuclear                  | none                    | no              |
| PmMYB18      | 113                   | 9.97                  | 13187.29              | 67.98             | -0.681                                  | nuclear                  | none                    | no              |
| PmMYB19      | 294                   | 9.17                  | 32815.75              | 55.33             | -0.716                                  | nuclear                  | none                    | no              |
| PmMYB20      | 1079                  | 5.65                  | 117356.94             | 54.23             | -0.535                                  | nuclear                  | none                    | no              |
| PmMYB21      | 317                   | 8.77                  | 35686.04              | 51.07             | -0.573                                  | nuclear                  | 1                       | no              |
| PmMYB22      | 417                   | 5.83                  | 47603.66              | 49.05             | -0.939                                  | nuclear                  | none                    | no              |

| Protein name | Number of amino acids | Isoelectric point(pI) | Molecular weight(kDa) | Instability index | Grand average of hydropathicity (GRAVY) | Subcellular localization | Transmembrane structure | Signal peptides |
|--------------|-----------------------|-----------------------|-----------------------|-------------------|-----------------------------------------|--------------------------|-------------------------|-----------------|
| PmMYB23      | 406                   | 5.47                  | 45895.63              | 57.64             | -0.755                                  | nuclear                  | none                    | no              |
| PmMYB24      | 342                   | 8.96                  | 38909.35              | 51.64             | -0.916                                  | nuclear                  | none                    | no              |
| PmMYB25      | 423                   | 6.77                  | 45278.28              | 58.15             | -0.594                                  | nuclear                  | none                    | no              |
| PmMYB26      | 365                   | 8.67                  | 41565.11              | 51.71             | -0.583                                  | nuclear                  | none                    | yes             |
| PmMYB27      | 312                   | 5.88                  | 35114.92              | 57.82             | -0.796                                  | nuclear                  | none                    | no              |
| PmMYB28      | 383                   | 6.45                  | 43387.42              | 62.68             | -0.638                                  | nuclear                  | none                    | no              |
| PmMYB29      | 573                   | 5.98                  | 61745.9               | 48.87             | -0.521                                  | nuclear                  | none                    | no              |
| PmMYB30      | 241                   | 8.49                  | 27387.03              | 71.4              | -0.747                                  | nuclear                  | none                    | no              |
| PmMYB31      | 218                   | 8.95                  | 23529.61              | 64.83             | -0.277                                  | nuclear                  | none                    | no              |
| PmMYB32      | 107                   | 9.84                  | 12508.47              | 56.14             | -0.715                                  | nuclear                  | none                    | no              |
| PmMYB33      | 442                   | 9.32                  | 50333.72              | 63.91             | -0.912                                  | nuclear                  | none                    | no              |
| PmMYB34      | 483                   | 5.33                  | 53805.48              | 50.36             | -0.629                                  | nuclear                  | none                    | no              |
| PmMYB35      | 415                   | 5.23                  | 45274.92              | 50.69             | -0.624                                  | nuclear                  | none                    | no              |
| PmMYB36      | 506                   | 6.54                  | 56672.97              | 44.85             | -0.723                                  | nuclear                  | none                    | no              |
| PmMYB37      | 405                   | 6.17                  | 45340.94              | 54.56             | -0.619                                  | nuclear                  | none                    | no              |
| PmMYB38      | 443                   | 7.64                  | 48999.75              | 44.4              | -0.715                                  | nuclear                  | none                    | no              |
| PmMYB39      | 317                   | 5.27                  | 35572.35              | 57.24             | -0.611                                  | nuclear                  | none                    | no              |
| PmMYB40      | 380                   | 7.62                  | 42650.66              | 66.45             | -0.693                                  | nuclear                  | none                    | no              |
| PmMYB41      | 232                   | 8.17                  | 25646.6               | 60.93             | -0.906                                  | nuclear                  | none                    | no              |
| PmMYB42      | 232                   | 7.59                  | 26010.4               | 53.95             | -0.715                                  | nuclear                  | none                    | no              |
| PmMYB43      | 300                   | 8.41                  | 33861.35              | 54.49             | -0.607                                  | nuclear                  | none                    | no              |
| PmMYB44      | 386                   | 4.72                  | 43193.95              | 59.72             | -0.585                                  | nuclear                  | none                    | no              |
| PmMYB45      | 438                   | 5.43                  | 48635.51              | 53.6              | -0.787                                  | nuclear                  | none                    | no              |

| Protein name | Number of amino acids | Isoelectric point(pI) | Molecular weight(kDa) | Instability index | Grand average of hydropathicity (GRAVY) | Subcellular localization | Transmembrane structure | Signal peptides |
|--------------|-----------------------|-----------------------|-----------------------|-------------------|-----------------------------------------|--------------------------|-------------------------|-----------------|
| PmMYB46      | 442                   | 5.52                  | 48821.18              | 52.24             | -0.592                                  | nuclear                  | none                    | no              |
| PmMYB47      | 1128                  | 5.05                  | 127035.22             | 53.48             | -0.936                                  | nuclear                  | none                    | no              |
| PmMYB48      | 1727                  | 5.68                  | 189753.5              | 53.4              | -0.758                                  | nuclear                  | none                    | no              |
| PmMYB49      | 386                   | 6.67                  | 43344.46              | 48.95             | -0.703                                  | nuclear                  | none                    | no              |
| PmMYB50      | 846                   | 9.19                  | 94616.39              | 49.97             | -0.933                                  | nuclear                  | none                    | no              |
| PmMYB51      | 245                   | 9.47                  | 28414.28              | 47.87             | -0.801                                  | nuclear                  | none                    | no              |
| PmMYB52      | 1116                  | 6.26                  | 122279.62             | 56.2              | -0.594                                  | nuclear                  | none                    | no              |
| PmMYB53      | 399                   | 6.38                  | 44815.69              | 50.4              | -0.693                                  | nuclear                  | none                    | no              |
| PmMYB54      | 181                   | 9.55                  | 20467.28              | 44.31             | -0.941                                  | nuclear                  | none                    | no              |
| PmMYB55      | 114                   | 9.84                  | 13255.11              | 62.85             | -0.849                                  | nuclear                  | none                    | no              |
| PmMYB56      | 513                   | 7.16                  | 59692.65              | 42.93             | -1.025                                  | nuclear                  | none                    | no              |
| PmMYB57      | 355                   | 8.72                  | 38364.15              | 58.2              | -0.578                                  | nuclear                  | none                    | no              |

**Table S3.** Prediction of phosphorylation sites of R2R3-MYB proteins in *Pinus massoniana*.

| Protein name | Phosphorylation sites number |           |          | Protein name | Phosphorylation sites number |           |          |
|--------------|------------------------------|-----------|----------|--------------|------------------------------|-----------|----------|
|              | Serine                       | Threonine | Tyrosine |              | Serine                       | Threonine | Tyrosine |
| PmMYB1       | 20                           | 6         | 2        | PmMYB30      | 20                           | 4         | 1        |
| PmMYB2       | 40                           | 9         | 6        | PmMYB31      | 25                           | 6         | 1        |
| PmMYB3       | 35                           | 12        | 1        | PmMYB32      | 3                            | 1         | 1        |
| PmMYB4       | 44                           | 12        | 7        | PmMYB33      | 51                           | 12        | 5        |
| PmMYB5       | 16                           | 11        | 3        | PmMYB34      | 34                           | 19        | 11       |
| PmMYB6       | 31                           | 15        | 4        | PmMYB35      | 35                           | 12        | 7        |
| PmMYB7       | 31                           | 10        | 1        | PmMYB36      | 32                           | 19        | 9        |
| PmMYB8       | 44                           | 21        | 3        | PmMYB37      | 30                           | 6         | 4        |
| PmMYB9       | 38                           | 13        | 1        | PmMYB38      | 39                           | 10        | 2        |
| PmMYB10      | 36                           | 12        | 7        | PmMYB39      | 32                           | 14        | 9        |
| PmMYB11      | 46                           | 20        | 5        | PmMYB40      | 40                           | 9         | 3        |
| PmMYB12      | 46                           | 19        | 3        | PmMYB41      | 24                           | 6         | 1        |
| PmMYB13      | 28                           | 6         | 3        | PmMYB42      | 16                           | 9         | 3        |
| PmMYB14      | 18                           | 12        | 1        | PmMYB43      | 27                           | 10        | 4        |
| PmMYB15      | 49                           | 16        | 2        | PmMYB44      | 30                           | 12        | 3        |
| PmMYB16      | 17                           | 9         | 3        | PmMYB45      | 34                           | 18        | 9        |
| PmMYB17      | 165                          | 46        | 9        | PmMYB46      | 38                           | 15        | 6        |
| PmMYB18      | 7                            | 2         | 0        | PmMYB47      | 62                           | 33        | 7        |
| PmMYB19      | 27                           | 15        | 1        | PmMYB48      | 165                          | 58        | 11       |
| PmMYB20      | 113                          | 34        | 7        | PmMYB49      | 36                           | 12        | 2        |
| PmMYB21      | 39                           | 11        | 4        | PmMYB50      | 50                           | 22        | 5        |
| PmMYB22      | 32                           | 14        | 5        | PmMYB51      | 10                           | 7         | 4        |
| PmMYB23      | 22                           | 9         | 1        | PmMYB52      | 127                          | 41        | 10       |
| PmMYB24      | 26                           | 5         | 2        | PmMYB53      | 43                           | 13        | 5        |
| PmMYB25      | 42                           | 6         | 4        | PmMYB54      | 11                           | 8         | 1        |
| PmMYB26      | 21                           | 11        | 9        | PmMYB55      | 4                            | 10        | 0        |
| PmMYB27      | 25                           | 15        | 1        | PmMYB56      | 49                           | 19        | 10       |
| PmMYB28      | 37                           | 17        | 4        | PmMYB57      | 35                           | 13        | 3        |
| PmMYB29      | 49                           | 18        | 3        |              |                              |           |          |

**Table S4.** Prediction of the Secondary Structure of R2R3-MYB proteins in *Pinus massoniana*.

| Protein name | Protein secondary structure(%) |                      |                |                  |
|--------------|--------------------------------|----------------------|----------------|------------------|
|              | Alpha helix (Hh)               | Extended strand (Ee) | Beta turn (Tt) | Random coil (Cc) |
| PmMYB1       | 38.67%                         | 5.00%                | 4.00%          | 52.33%           |
| PmMYB2       | 29.40%                         | 17.15%               | 8.91%          | 44.54%           |
| PmMYB3       | 32.96%                         | 11.14%               | 5.35%          | 50.56%           |
| PmMYB4       | 29.59%                         | 11.02%               | 6.73%          | 52.65%           |
| PmMYB5       | 25.49%                         | 7.06%                | 6.67%          | 60.78%           |
| PmMYB6       | 38.77%                         | 6.15%                | 4.81%          | 50.27%           |
| PmMYB7       | 30.21%                         | 6.42%                | 2.94%          | 60.43%           |
| PmMYB8       | 33.96%                         | 12.76%               | 10.13%         | 43.15%           |
| PmMYB9       | 32.77%                         | 6.07%                | 3.16%          | 58.01%           |
| PmMYB10      | 27.54%                         | 15.89%               | 8.26%          | 48.31%           |
| PmMYB11      | 48.50%                         | 8.43%                | 3.37%          | 39.70%           |
| PmMYB12      | 36.33%                         | 8.98%                | 3.52%          | 51.17%           |
| PmMYB13      | 20.43%                         | 11.11%               | 4.30%          | 64.16%           |
| PmMYB14      | 24.46%                         | 10.73%               | 8.15%          | 56.65%           |
| PmMYB15      | 26.51%                         | 9.44%                | 6.22%          | 57.83%           |
| PmMYB16      | 37.14%                         | 9.64%                | 7.14%          | 46.07%           |
| PmMYB17      | 20.91%                         | 9.65%                | 4.06%          | 65.38%           |
| PmMYB18      | 38.94%                         | 4.42%                | 13.27%         | 43.36%           |
| PmMYB19      | 22.11%                         | 9.52%                | 3.40%          | 64.97%           |
| PmMYB20      | 31.33%                         | 12.23%               | 5.93%          | 50.51%           |
| PmMYB21      | 38.17%                         | 10.41%               | 3.15%          | 48.26%           |
| PmMYB22      | 35.25%                         | 10.55%               | 8.15%          | 46.04%           |
| PmMYB23      | 30.54%                         | 10.59%               | 5.67%          | 53.20%           |
| PmMYB24      | 37.72%                         | 14.91%               | 6.73%          | 40.64%           |
| PmMYB25      | 37.12%                         | 8.51%                | 4.02%          | 50.35%           |
| PmMYB26      | 26.58%                         | 13.70%               | 6.58%          | 53.15%           |
| PmMYB27      | 23.08%                         | 16.35%               | 12.50%         | 48.08%           |
| PmMYB28      | 28.98%                         | 10.97%               | 8.36%          | 51.70%           |
| PmMYB29      | 26.00%                         | 5.24%                | 2.97%          | 65.79%           |
| PmMYB30      | 31.12%                         | 4.56%                | 8.30%          | 56.02%           |
| PmMYB31      | 16.51%                         | 14.22%               | 1.83%          | 67.43%           |
| PmMYB32      | 26.17%                         | 14.95%               | 13.08%         | 45.79%           |
| PmMYB33      | 43.67%                         | 7.69%                | 5.20%          | 43.44%           |
| PmMYB34      | 29.19%                         | 10.35%               | 5.18%          | 55.28%           |
| PmMYB35      | 34.46%                         | 10.60%               | 6.02%          | 48.92%           |
| PmMYB36      | 21.34%                         | 13.44%               | 7.11%          | 58.10%           |
| PmMYB37      | 27.16%                         | 9.63%                | 5.43%          | 57.78%           |
| PmMYB38      | 36.79%                         | 5.42%                | 2.71%          | 55.08%           |
| PmMYB39      | 28.08%                         | 6.31%                | 3.47%          | 62.15%           |
| PmMYB40      | 32.63%                         | 10.00%               | 5.79%          | 51.58%           |

| Protein<br>name | Protein secondary structure(%) |                 |           |             |
|-----------------|--------------------------------|-----------------|-----------|-------------|
|                 | Alpha helix                    | Extended strand | Beta turn | Random coil |
|                 | (Hh)                           | (Ec)            | (Tt)      | (Cc)        |
| PmMYB41         | 37.93%                         | 10.78%          | 5.60%     | 45.69%      |
| PmMYB42         | 30.60%                         | 6.47%           | 6.03%     | 56.90%      |
| PmMYB43         | 28.90%                         | 5.52%           | 5.52%     | 61.69%      |
| PmMYB44         | 32.90%                         | 9.33%           | 7.25%     | 50.52%      |
| PmMYB45         | 24.66%                         | 9.59%           | 5.94%     | 59.82%      |
| PmMYB46         | 27.15%                         | 11.31%          | 4.98%     | 56.56%      |
| PmMYB47         | 50.62%                         | 6.21%           | 3.19%     | 39.98%      |
| PmMYB48         | 34.34%                         | 12.97%          | 6.49%     | 46.21%      |
| PmMYB49         | 30.05%                         | 13.21%          | 5.70%     | 51.04%      |
| PmMYB50         | 28.01%                         | 14.18%          | 6.62%     | 51.18%      |
| PmMYB51         | 37.96%                         | 9.39%           | 6.94%     | 45.71%      |
| PmMYB52         | 32.08%                         | 14.78%          | 6.27%     | 46.86%      |
| PmMYB53         | 33.33%                         | 13.28%          | 6.52%     | 46.87%      |
| PmMYB54         | 35.36%                         | 6.08%           | 4.97%     | 53.59%      |
| PmMYB55         | 47.37%                         | 7.02%           | 7.02%     | 38.60%      |
| PmMYB56         | 49.32%                         | 4.29%           | 2.53%     | 43.86%      |
| PmMYB57         | 24.79%                         | 8.73%           | 4.23%     | 62.25%      |

**Table S5.** Conserved Motif Analysis of R2R3-MYB proteins in *Pinus massoniana*.

| Motif | Logo                                                                              | E-value   | Sites | Width |
|-------|-----------------------------------------------------------------------------------|-----------|-------|-------|
| 1     |  | 3.9e-1055 | 44    | 41    |
| 2     |  | 2.1e-924  | 49    | 29    |
| 3     |  | 4.3e-498  | 49    | 23    |
| 4     |  | 1.8E-138  | 34    | 11    |
| 5     |  | 2.5E-95   | 22    | 11    |



**Table S6.** Functional annotation of R2R3-Myb subfamily in *Pinus massoniana*.

| Subgroups of R2R3-MYB | Function annotation                                                                       |                                                                           | The group members                                                    |
|-----------------------|-------------------------------------------------------------------------------------------|---------------------------------------------------------------------------|----------------------------------------------------------------------|
| S1                    | Abiotic stress response                                                                   | Biotic stress response                                                    | PmMYB21                                                              |
| S2                    | Brassinosteroid pathway                                                                   | Hypocotyle elongation                                                     | PmMYB10, PmMYB44                                                     |
| S4                    | Phenylpropanoid pathway                                                                   | Sinapateester biosynthesis                                                | PmMYB5, PmMYB14, PmMYB30, PmMYB6, PmMYB43, PmMYB26, PmMYB18, PmMYB51 |
| S5                    | Phenylpropanoid pathway, Proanthocyanindinsbio synthesis                                  |                                                                           | YB26, PmMYB18, PmMYB51                                               |
| S9a                   | Cell fate                                                                                 | Conical epidermal cell outgrowthTrichome branching                        | PmMYB49                                                              |
| S11                   | Abiotic stress response                                                                   | Osmotic, ABA-mediated                                                     | PmMYB53                                                              |
| S13                   | Mucilage deposition and extrusion                                                         | Phenylpropanoidpathway Lignin biosynthesis Stomatal closure               | PmMYB8, PmMYB37                                                      |
| S14                   | Axillary meristem regulation                                                              | Lateral organformation Root elongation                                    | PmMYB35                                                              |
| S18                   | Stamen and anther development                                                             | Abiotic stress response ABA sensitivity                                   | PmMYB29                                                              |
| S20                   | Stamen development                                                                        | Abiotic/biotic stress response Pollen maturation ABA – GA- or JA-mediated | PmMYB55                                                              |
| S21a                  | Cell wall thickening                                                                      | Axillary meristem regulation Lateral organ formation                      | PmMYB24                                                              |
| S21b                  | Cell wall thickening                                                                      | Axillary meristem regulation Lateral organ                                | PmMYB3                                                               |
| S22                   | Abiotic stress response                                                                   | Growth regulation                                                         | PmMYB7, PmMYB57                                                      |
| S28                   | secondary wall biosynthesis                                                               |                                                                           | PmMYB16                                                              |
| S37                   | Mucilage synthesis, seed coat development, and trichome morphogenesis Lignin Biosynthesis |                                                                           | PmMYB23, PmMYB32, PmMYB45, PmMYB46                                   |

**Table S7.** Cis-acting element analysis of *PmMYB4* promoter in *Pinus massoniana*.

| Element     | Core sequence    | Function                                                             | Amount |
|-------------|------------------|----------------------------------------------------------------------|--------|
| G-Box       | CACGTT           | cis-acting regulatory element involved in light responsiveness       | 4      |
| AE-box      | AGAAACAA         | part of a module for light response                                  | 1      |
| ATCT-motif  | AATCTAATCC       | part of a conserved DNA module involved in light responsiveness      | 2      |
| ARE         | AAACCA           | cis-acting regulatory element essential for the anaerobic induction  | 2      |
| CAAT-box    | CCAAT            | common cis-acting element in promoter and enhancer regions           | 40     |
| TATA-box    | ccTATAAAaa       | core promoter element around -30 of transcription start              | 77     |
| CGTCA-motif | CGTCA            | cis-acting regulatory element involved in the MeJA-responsiveness    | 4      |
| ABRE        | TACGTGTC         | cis-acting element involved in the abscisic acid responsiveness      | 4      |
| GT1-motif   | GGTTAA           | light responsive element                                             | 2      |
| TGACG-motif | TGACG            | cis-acting regulatory element involved in the MeJA-responsiveness    | 3      |
| Box 4       | ATTAAT           | part of a conserved DNA module involved in light responsiveness      | 6      |
| TCCC-motif  | TCTCCCT          | part of a light responsive element                                   | 1      |
| MBS         | CAACTG           | MYB binding site involved in drought-inducibility                    | 1      |
| MBSI        | aaaAaaC(G/C)GTTA | MYB binding site involved in flavonoid biosynthetic genes regulation | 1      |

>PmMYB4

ATGAGCTGCACAACAGGAGGACTCTCCTCTCCCATCTCCAAACCAAGCTAAGGAAAGGCCTCTGGTCGCCT  
GAGGAGGATGATAAACTCATCAACTACATGATGAAAAACGGCCAGGGTTGCTGGAGCGATGTCGTAAGCA  
AGCTGGTCTGCAGAGATGCGGAAAAAGCTGTAGGCTGAGGTGGATTAATACTATTTAAGGCCCCGACCTCAAAC  
GCGGTGCATTTTCACCCCAGGAAGAACAATTGATCATACACTTGCATTCCATTCTGGGCAACAGGTGGTCTCA  
GATTGCAGCCCGTTTGCCCGGACGTACGGACAACGAGATCAAGAATTTCTGGAACTCCTGCATAAAGAAGA  
AGTTGAAACACCTTTTCGGCCTCCACCAACAACAGTAAATCTATCTCTGCACCTAATCGTACCAGTACCATGAAT  
TCATCGATCACGCCCTTTTCTGAATCGTCTGCCGAGCCATTGGAGGTCATGGCAACAAGGTATCAGCCATCGA  
ATGCTTTTAATCATGAAGTGCTCACTGCAGAAAATCAGTTTTGTATTCCGGATGTATTGGCATTAAAGACATGAG  
CAAGTACAGAGTCAGAATCAATTTCAATTGATCAGGACTCGGCCACCAACAATCTCATTTCCCACCTGTGGA  
ATTCCAATTCTATATCTGTTTCTTCCCATGAGAGCTTCTCCCATGCCTTCATGTCTCCGGGTCTGCAAGCGCAAG  
GCCATGCTGTAAAGACTCCAATTAACCATGCGATCAAATCTCGTGGAGTACACCACTGACTCGTGAAGCTGC  
TGGGTCTCATGCCTGCAATTAATCTCTTGGCTGCAACATCCCTGCTCTTGTGAGAGCGAGTCACTGAAAGAA  
AAATTCAAGAATGATGCAGGCGATCAGATTAATGAAAATGAGATCATGTATTCTCCACGGCATCTTCTGTGAT  
AACTGCATGGAGCACTAATTCCTATTGAGATGCCGAATATTGTACTGTGATCCACATGATCAGGTGGGAAGTA  
TCCTGGAAGATTACGTGAGCCATGAGAAGACTACGGATCATCAGCCATGCCACCCTTAATTCCTCTGTGCA  
ATTCAGCGCCCTGAAATTAGATGGACTGCTGATCAGTCTAACGATGAGGAATATGACTGCAAGGATCGTCTA  
AATTTGAGATATGATGTAAATTTGGGGTACCCTAATAATACTAACAACAAGCAGAACGGTTACCAGCTGCCTC  
AGATCGGAGGAGGAGGGGTTAATGGCGATCACTGGGATTGCACAAGAATTCCCAACATGGAAGAAGCCAA  
CAGTACAACACCAACTTCTACGATACTAGGAGGCAGTGGGCAGTTTGAGTTTGAGTGTGATGGTGTGATGCA  
GCGGCCATGTCACAGCTTGGGCTCATGACGCTCTGTATAATGATATACATACAGCTGCTTCTGATCTGCTAGGT  
CAGATCTATTTTGGCTAA

>PmMYB4-optimization

ATGTCCTGCACCACCGGTGGTCTGTCTTCCCGATTCTAAACCAAACTGCGTAAAGGTCTGTGGAGCCCTG  
AAGAAGATGATAAACTGATTAACATACATGATGAAAAACGGCCAGGGTTGTTGGTCTGATGTTGCAAAACAGG  
CAGGCCTGCAGCGTTGCGGTAAAAGCTGCCGTCTGCGTTGGATCAATTATCTGCGTCCGGACCTGAAACGTG  
GTGCTTTCTCCCCGAGGAAGAACAGCTGATTATCCATCTGCACTCCATCCTGGGTAACCGTTGGAGCCAGAT  
CGCTGCACGTCTGCCGGGTGCTACTGACAACGAAATCAAAAATCTGGAACCTTTGTATTAAAAAAAAT  
GAAGCACCTGTCTGCGTCCACTAATAACAGCAAATCCATCAGCGCTCCTAACCGTACCTCTACTATGAACAGCT  
CTATACCCCTTTTTCTGAATCCTCTGCAGAACCGCTGGAAGTTATGGCAACTCGTTATCAGCCGTCCAACGCA  
TTTAATCACGAGGTGCTGACCGCTGAAAACCAAGTTCTGCATTCCGGATGTGCTGGCGCTGCGTCATGAACAA  
GTACAGAGCCAGAACCAGTTCAGCATTGACCAGGATAGCGCGACTAACAACCTGATTAGCCACCTGTGGAAC  
AGCAACTCCATCTCTGTAAGCAGCCACGAATCCTTTAGCCACGCTTTCATGTCTCCGGGTCTGCAGGCACAA  
GGTCACGCTGTGAAAACCCCTATCAAGCCGTGCGACCAGATTTCTTGGTCTACCCCACTGACTCGTGAAGCG  
GCAGGTTCCACGCTTGTAACTATTCTCTGGGCTGCAATATTCCAGCTCTGGTTGAATCTGAATCCCTGAAAG  
AAAAATTTAAAAACGACGCTGGTGATCAGATCAACGAAAATGAGATCATGTACTCTTCTACGGCTTCCTCCGT  
GATCACCGCTGGAGCACCAACTCTTACAGCGATGCAGAGTACTGCACCGCTGACCCGCATGATCAGGTGCG  
TAGCATCCTGGAAGACTACGTAAGCCATGAAAAGACTACCGACCATCAGCCATGCCCGCCACTGAACTCCAG  
CGTGCAAGTTCTGCTCCGGAAATCCGCTGGACCGCAGACCAGTCCAACGACGAAGAATATGATTGCAAAGA  
TCGCCTGAATCTGCGTTATGACGTTAATCTGGGCTACCCGAACAACACCAACAACAACAGAACGGTTATCAG  
CTGCCGCAGATCGGTGGTGGTGGTGTAAACGGTGATCACTGGGATTGCACCCGCATTCCAAATATGGAAGAA

GCGAACAGCACCCTCTACCTCTACCATCCTGGGTGGCTCTGGTCAGTTCGAATTGACGGCGAT  
GCGGGTGGTCACGTGACTGCATGGGCTCACGACGCGCTGTATAACGATATCCATACGGCTGCATCTGATCTGC  
TGGGCCAGATCTACTTTGGTTAA

>Pro-PmMYB4

CATTGCCCATATTAAAAAAACTATAAAAAATTAATAATTATAACCTTATTTTAAATTATTATTATTATTAATTATAA  
AAAGAATTAATATGAGTTAAACATATATACATTTAAAAAATATGTAATAAATTCTTAACCATGAAGATTCATCCC  
ATTTTACCAATAAAATTCTTAATATGTAGATAGTTATTGTTTGGAGCTTTTGTATCCTTGATAAATAATTATTGTTA  
CAATTCCATGGGCCAATACCATGGCTTATCAATACGACATGCCCAATATGACATGTGTTGATCAATATGAAATTT  
TCTTTAATTTCTTAATTTGAGATAAATTAATTAAGAGCATAATTAATCGGAAGATAAATCTTAACCCTAGATCT  
ATGAATACTACTACAAATATTTAAACATTTTCATGGAAGTTAAATCTCTATCACCCACCTAATAATTAATAAATG  
TAAATTAATTTTAAATTAACAATATATTTTAGTTATCTCACTAAATGTCCTTATAAAAAACAAACATCGTCATTA  
TTTATATGAAAAAAACCCTTATATTTTTTAAACTATATTATAATTTTTTATAAATGCTTTTGATAACTACATATAA  
ACCTACATATTAATAATATGTATATATATAAAATAAAATATATATTGTTATAGCATCGCTTGTTTCGAGAAACAATTG  
GGTAGTTAGCTTAGACATTGACTTTGAAAGAATGAAGTTGTTGAAGATAGACCTTGACATGTACATGGCATAA  
TGAAACCACTTTGTTATAAACTCTCTTTACTTCGTTCTATATAAGATTATAAAAGATTAGTTGTTATACCTTATA  
CGAAGGTTGTCCTAATTCATTTTAAGGAGGGACAATCATAAAAAAATTCAGTGTTATGATATACCAGGATTGG  
ATTGATCATGCAATCTCAAAGTACACCTAATCATTTAAAAAATATAGAGCATTGGCATGTATGATAAACCTTC  
ATAGTTATGCATTATATAGTGATGATAATAAAGTAAATAATGCCAATATTATGGTATACCAATTATATTTGTACGT  
GTCGGTGCATGCACCGACATCAAAAACAACTTATTGGGGGGTAAAATTTGCTGGGCATTCTTTCTGTGCG  
TGACGACATTCTTTCACTCTAATTCAAAGGGGAGAACTTGTTTGAGGGCCAAGTCGTGTCGAGACTGTTGTT  
GCGTTGAAAGCACATCTTATTATAATGATGATGAGTAGAGAAGGGATTGATTAACCTAAGAGTGAAGAAACAT  
ACGGACAGATAGATTAGATTTGGCACGAATGATTTATGCTTGACAGGAACACTGAAGTAAATCCCTGCTCA  
TCCTTCGATTTACCGTTAACGAATGAATAGTTGAAGTTGACGCTGGCGAATATCTATAATCTTCTGGTTTGCGG  
CCTCCAATGGCGGAATTCCTTTGGAGAAAAGAATGATTAGCTGTTGATGAGAAATATAATAATGTACAACAAT  
GATCCGTATTGAAAGCAAAGAGTTGGTTGCCACGTTGTAATGATTGAAGATTGACGATGGGAGAAAATGAT  
GTTCTCTGAGGGTACCCACCATAACAACACACACGTTTGATGTGTGTGTGTTTGAATAAATGAACGGAGCCCTG  
AGCTGCTCAGTTGCTGGTGAGCGCACTTAAGAAGTACACAAGCACGGCCATTCCGTTTCATTCTGCGGGTGA  
AATGAGCTGCACAACAGGAGGACTCTCCTCTCCCATCTCAAACCCAAGCTAAGGAAAGG
